# Supplementary material for: Insights on the drivers of genetic divergence in the European anchovy
Source: PubMed Central journal article supplement (PMC5482869; doi:10.1038/s41598-017-03926-z), 2017-06-23
Supplement: 41598_2017_3926_MOESM1_ESM.pdf [file 41598_2017_3926_MOESM1_ESM.pdf]

## SUPPLEMENTARY INFORMATIONS:

### Insights on the drivers of genetic divergence in the European anchovy

Gaetano Catanese<sup>1,A,\*</sup>, Romain Watteaux<sup>1,\*</sup>, Iratxe Montes<sup>2</sup>, Marco Barra<sup>3</sup>, Paola Rumolo<sup>3</sup>, Diego Borme<sup>4</sup>, Bruno Buongiorno Nardelli<sup>3</sup>, Vincenzo Botte<sup>3</sup>, Maria Grazia Mazzocchi<sup>1</sup>, Simona Genovese<sup>3</sup>, Iole Di Capua<sup>1</sup>, Mikel Iriondo<sup>2</sup>, Andone Estonba<sup>2</sup>, Paolo Ruggeri<sup>5,6</sup>, Valentina Tirelli<sup>4</sup>, Vincenzo Caputo-Barucchi<sup>5</sup>, Gualtiero Basilone<sup>3</sup>, Angelo Bonanno<sup>3</sup>, Daniele Iudicone<sup>1</sup> & Gabriele Procaccini<sup>1</sup>

<sup>1</sup>Department of Integrative Marine Ecology, Stazione Zoologica Anton Dohrn-SZN, Villa Comunale, 80121 Napoli, Italy;

<sup>2</sup>Department of Genetics, Physical Anthropology and Animal Physiology, University of the Basque Country-UPV/EHU, Sarriena auzoa z/g, Leioa - Bizkaia, Spain;

<sup>3</sup>Institute for Coastal and Marine Environment (IAMC), Consiglio Nazionale delle Ricerche-CNR, Detached Units of Capo Granitola (TP) and Naples, Italy;

<sup>4</sup>Istituto Nazionale di Oceanografia e di Geofisica Sperimentale-OGS, Department of Oceanography, Via A. Piccard 54, 34151 Trieste, Italy;

<sup>5</sup>Dipartimento di Scienze della Vita e dell'Ambiente-DiSVA, Università Politecnica delle Marche, via Brecce Bianche, 60131 Ancona - Italy;

<sup>6</sup>University of Miami, RSMAS, 4600 Rickenbacker Causeway, 33149, Miami, Florida (USA).

**Figure S1** STRUCTURE ANALYSIS. The number of sub-populations ( $\Delta K$ ) was determined using the method of Evanno<sup>39</sup> based on the rate change in the log probability of data between successive K values, and implemented in Structure Harvester.  $\Delta K$  reached its maximum value when K = 2

a) Proportional membership (Q) of each accession at K=2. Atlantic sampling sites considered as coastal in Montes *et al.*<sup>20</sup> are labelled with red letters. b) Plot of  $\Delta K$ .

a)

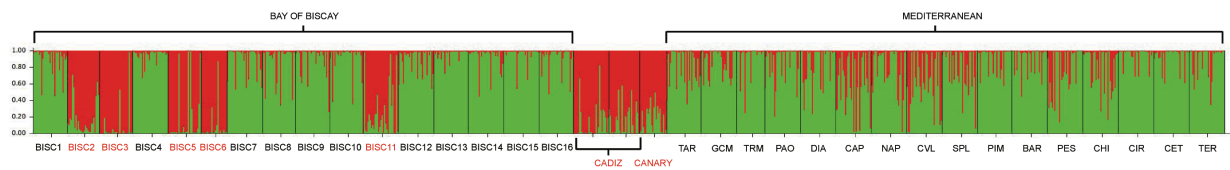

b)

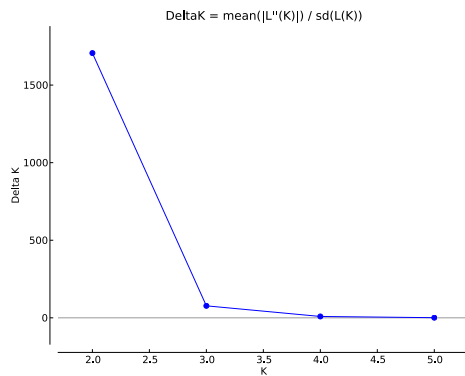

| K | Reps | Mean LnP(K)    | Stdev LnP(K) | Ln'(K)      | Ln''(K)     | Delta K     |
|---|------|----------------|--------------|-------------|-------------|-------------|
| 1 | 10   | -108190.500000 | 0.081650     | -           | -           | -           |
| 2 | 10   | -98576.225000  | 4.594471     | 9614.275000 | 7839.500000 | 1706.289900 |
| 3 | 10   | -96801.450000  | 13.433416    | 1774.775000 | 1037.975000 | 77.268135   |
| 4 | 10   | -96064.650000  | 7.079313     | 736.800000  | 62.325000   | 8.803821    |
| 5 | 10   | -95390.175000  | 616.9046025  | 674.475000  | 552.100000  | 0.894952    |
| 6 | 10   | -94163.600000  | 107.309583   | 1226.575000 | -           | -           |

**Figure S2** Genetic barriers predicted by BARRIER (version 2.2), employing Monmonier's maximum difference algorithm to highlight geographical features corresponding to pronounced genetic discontinuity in Tyrrhenian Sea (red bold lines with arrows). Sampling sites (red points) are shown.

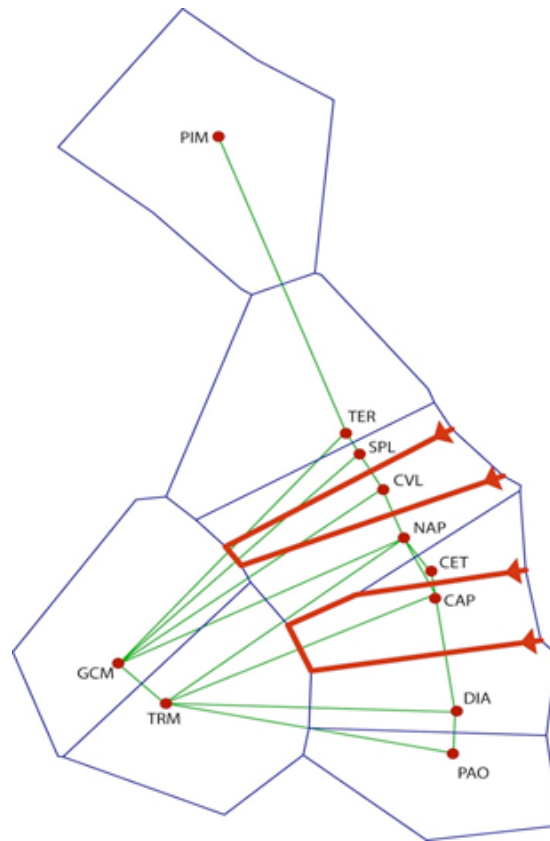

**Figure S3** Detection of outlier SNPs. a) BayeScan Log<sub>10</sub>(q value) are shown on the x-axis and  $F_{ST}$ -values on the y axis. Log<sub>10</sub>(q-value): decision factor in logarithmic scale (base 10) to determine selection; b) Lositan graphical output with the simulated confidence area for neutral loci (grey color band) with loci from the original empirical dataset represented as dots. Candidate positive selection outliers are situated in the red band.

a)

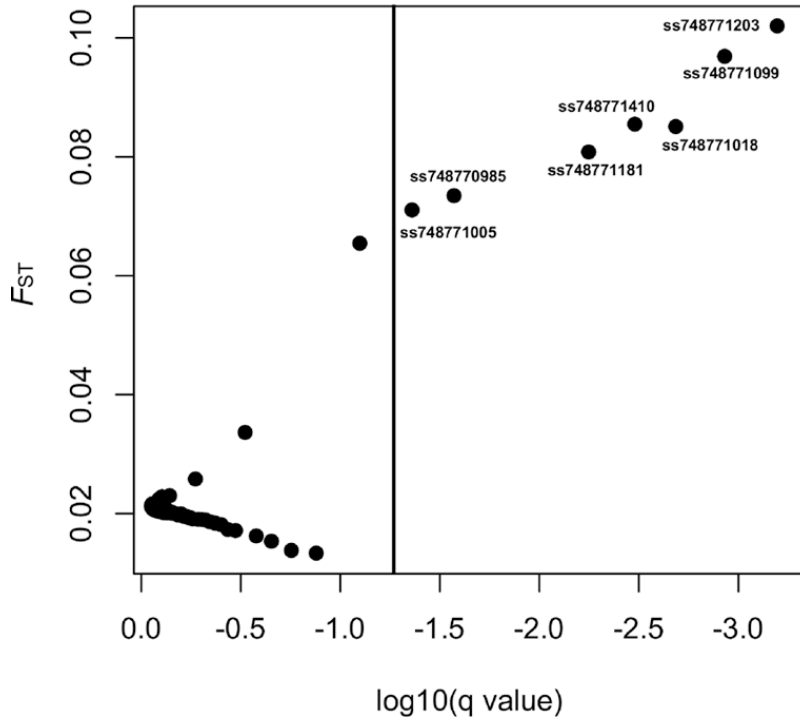

b)

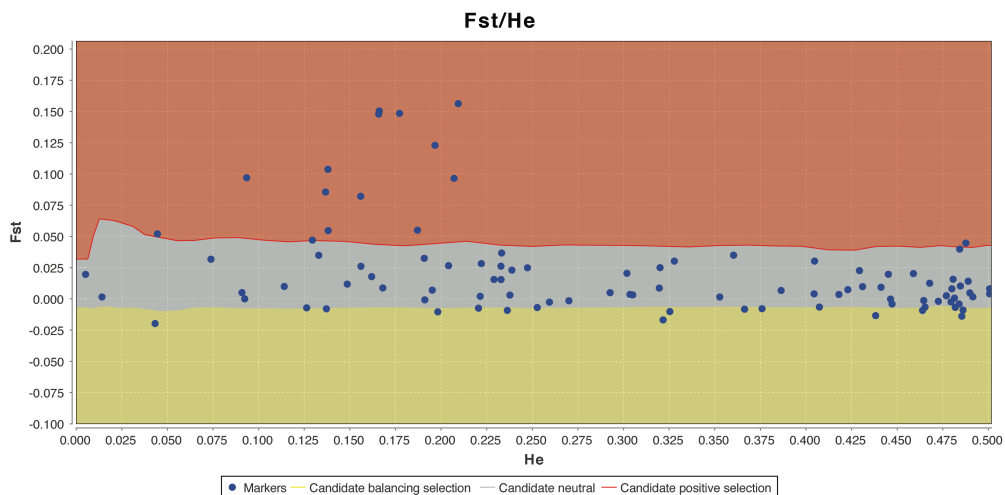

**Figure S4** PCoA of Mediterranean and Atlantic samples with (a) only putative neutral markers (variance of axis 1: 65.11%; variance of axis 2: 13.27%); and (b) with putative outliers markers (variance of axis 1: 98.58%; variance of axis 2: 0.85%). Atlantic coastal populations are labelled with red letters. PCoA of the Mediterranean and Atlantic samples grouped by sampling locality with (c) only putative neutral markers (variance of axis 1: 63.2%; variance of axis 2: 18%); and (d) with putative outliers markers (variance of axis 1: 94.9%; variance of axis 2: 3.8%). In circles we highlighted the different ecotypes. PCoA of Tyrrhenian adult anchovies and eggs sample sites (e) with putative neutral markers (variance of axis 1: 24.41%; variance of axis 2: 9.20%) and (f) putative outlier markers (variance of axis 1: 84.5%; variance of axis 2: 8.44%).

a)

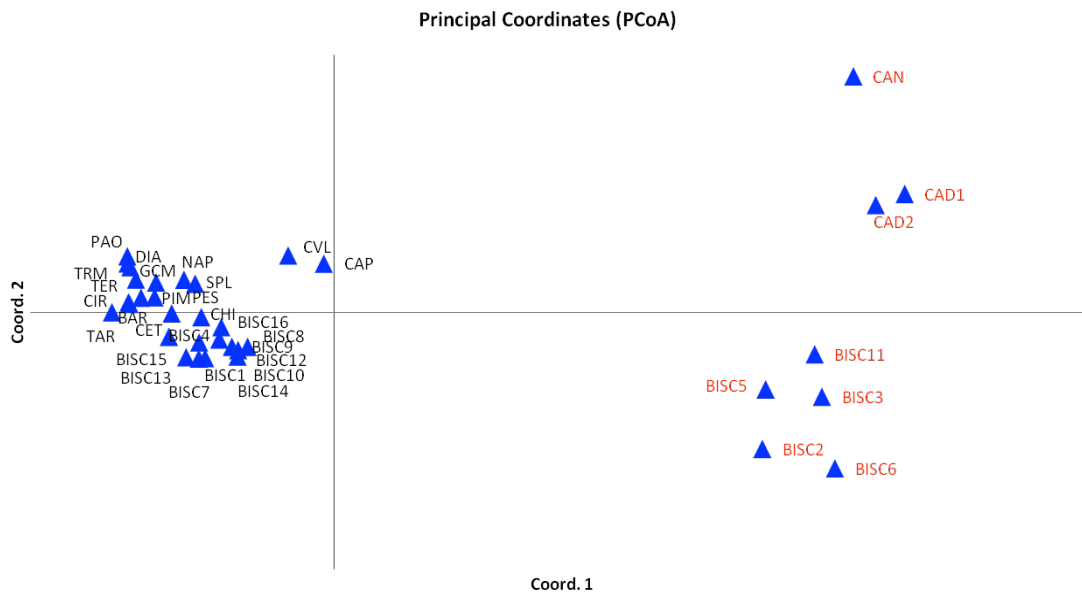

b)

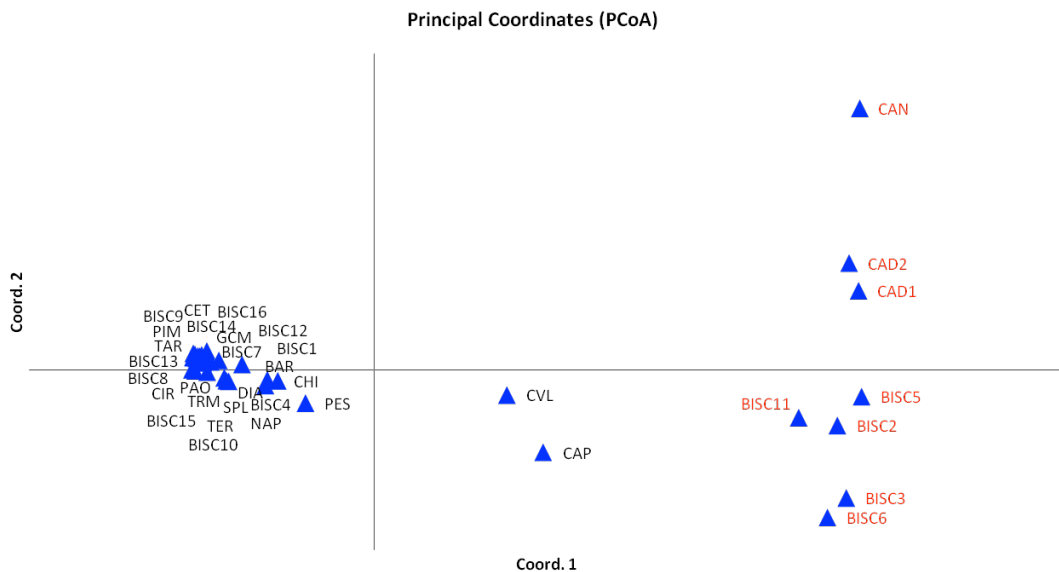

c)

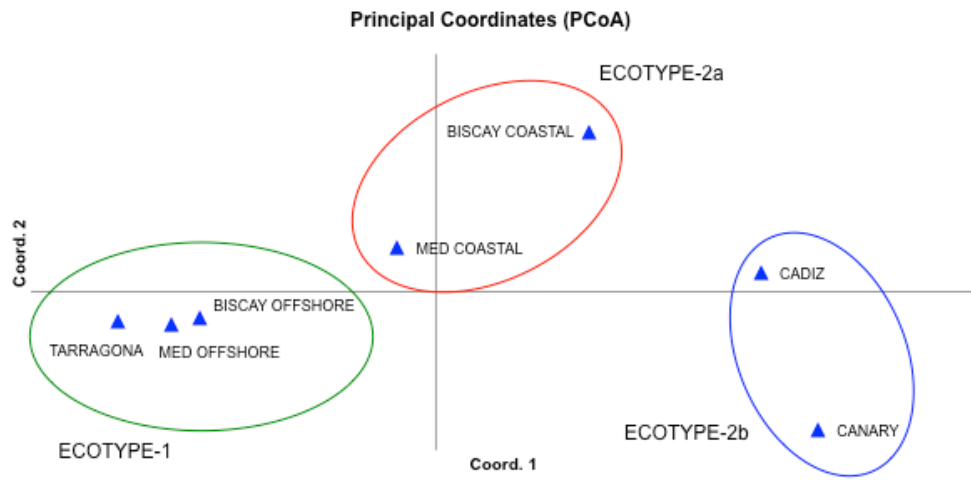

d)

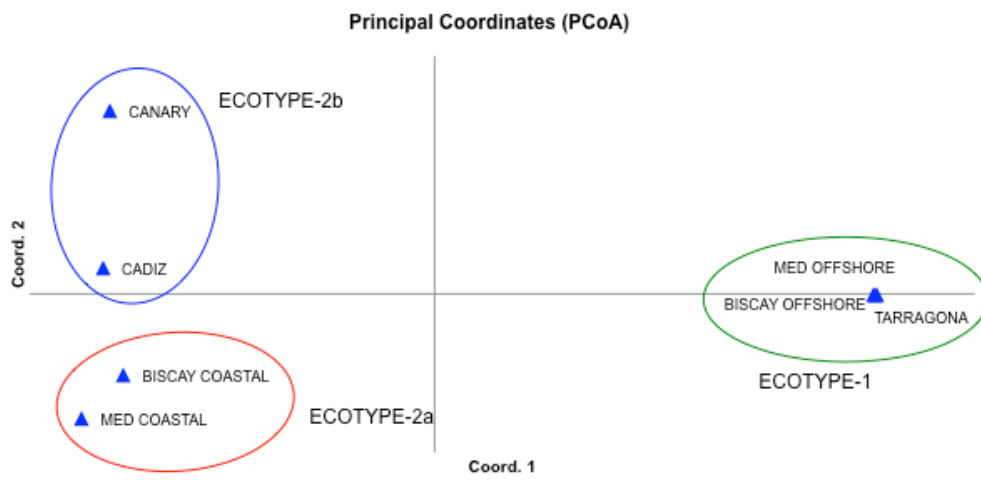

e)

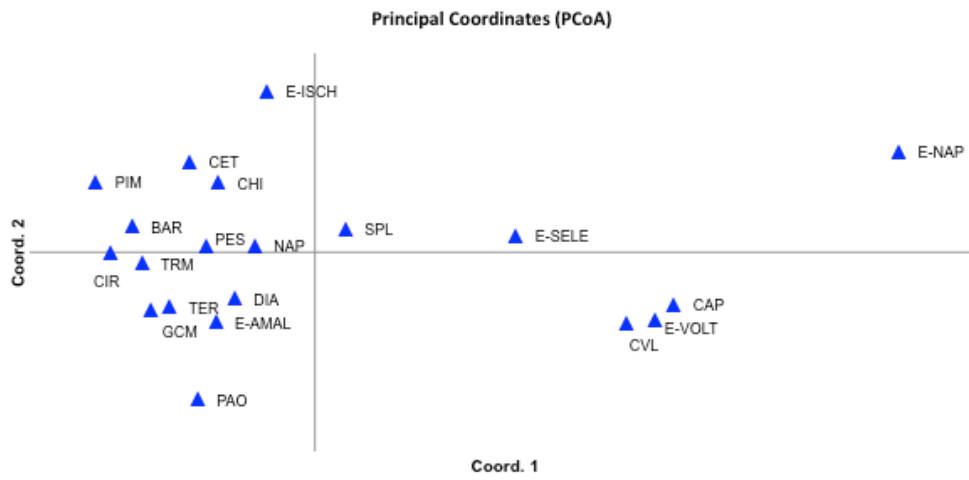

f)

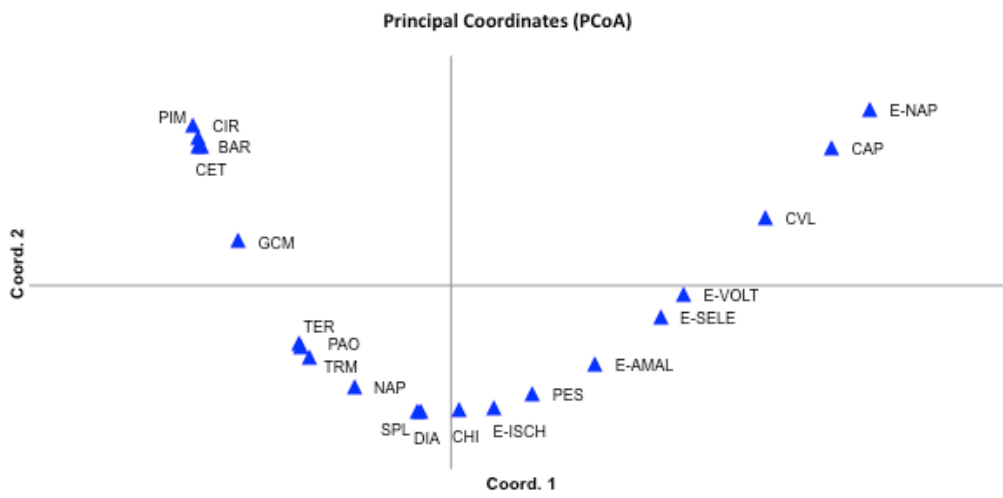

**Figure S5.** Characterization of the zooplankton community in a sub-set of stations in which anchovies were collected; a) total zooplankton biomass; b) relative abundance of copepods; c) abundance of most representative groups

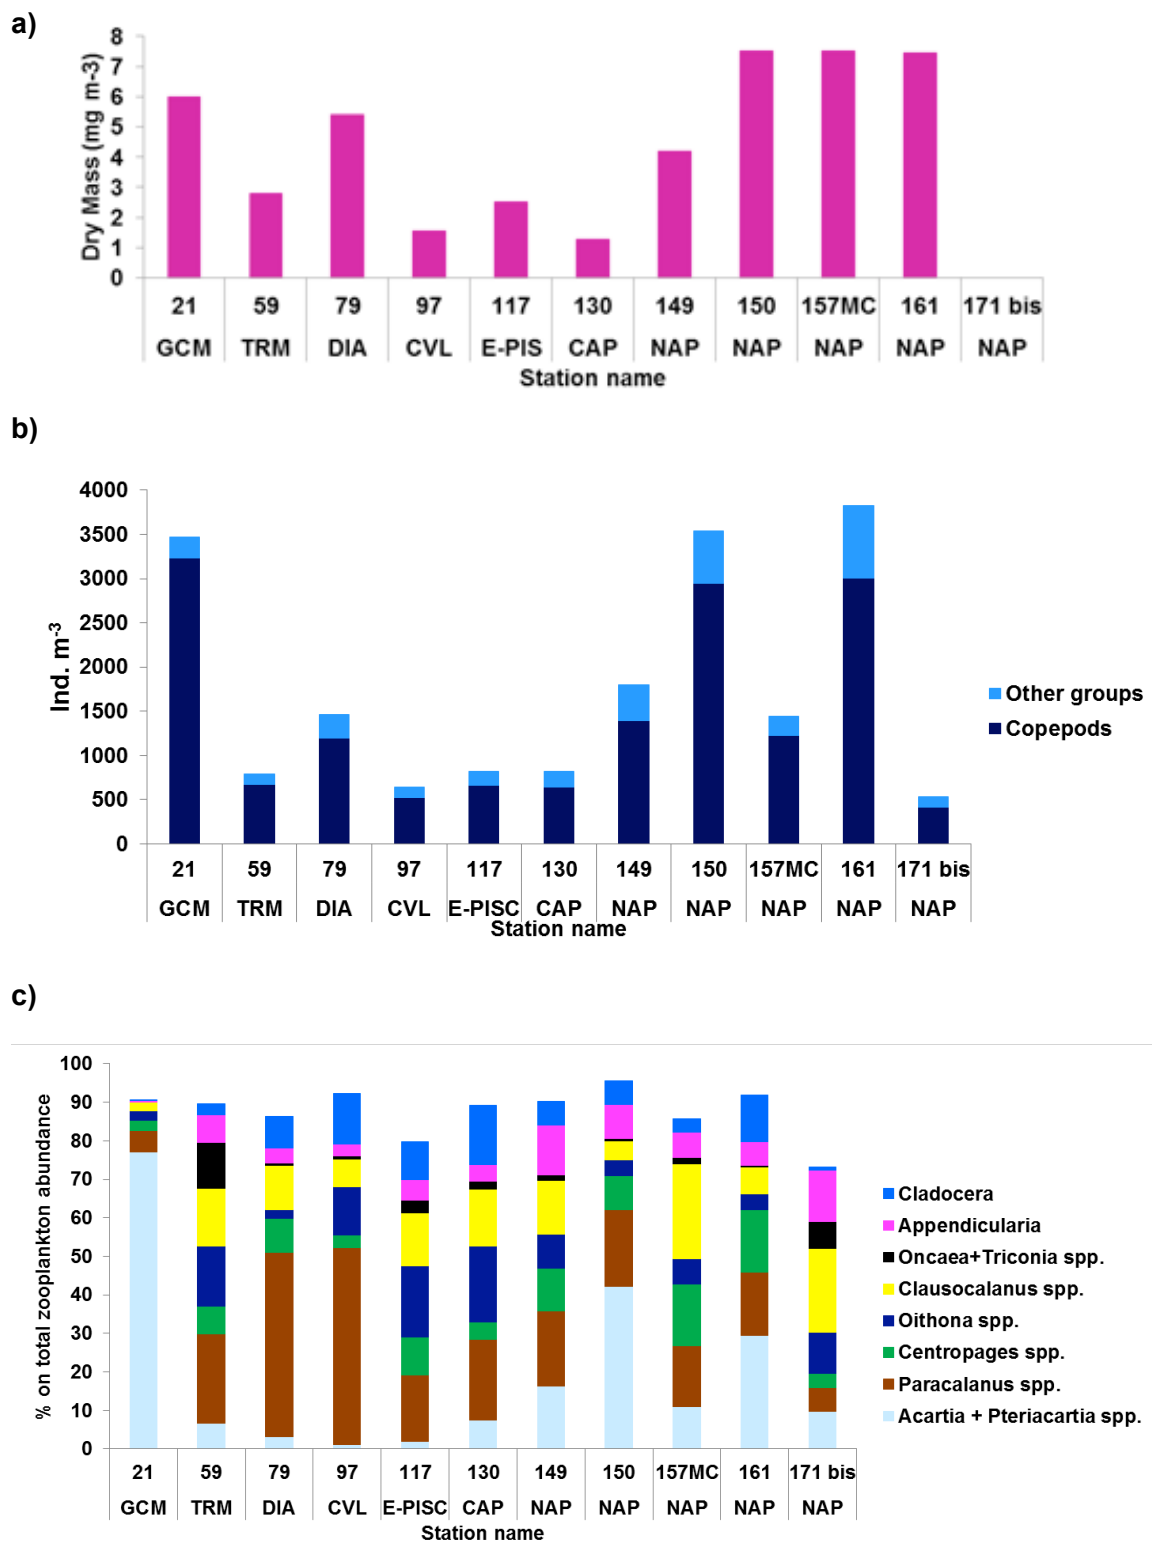



**Figure S6** (a) Clustering of the different areas obtained using the diet of anchovy as descriptor, (b) MDS representation of the similarity among areas obtained using the diet of anchovy as descriptor.

a)

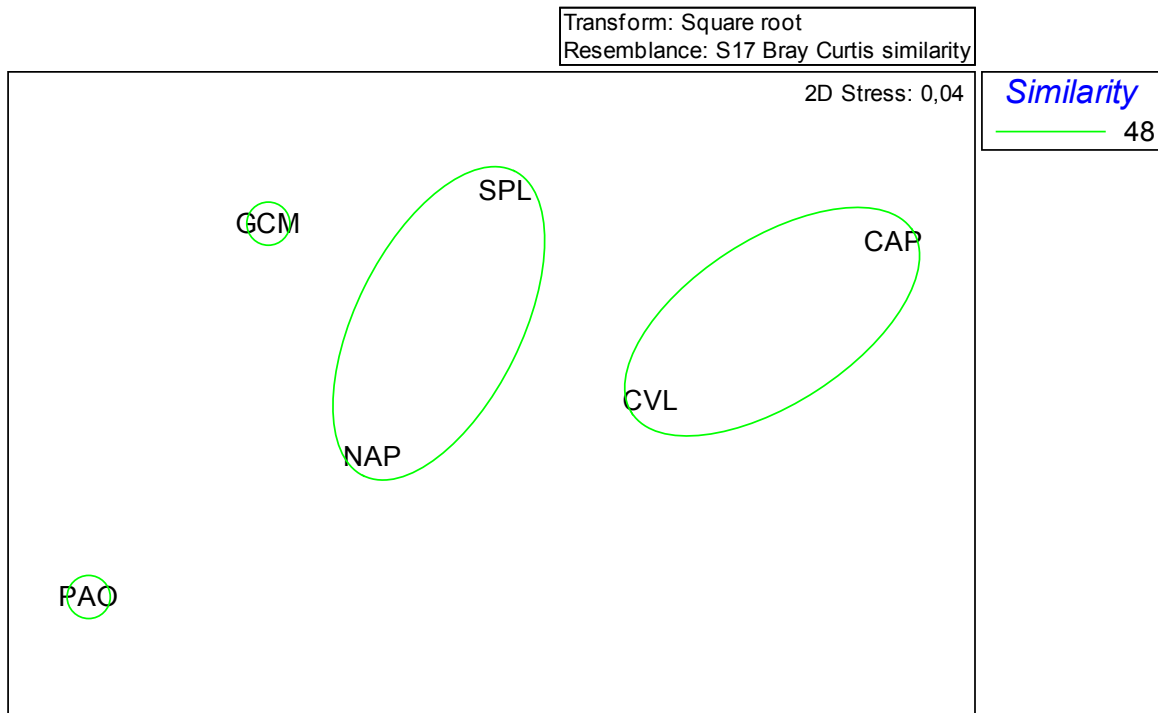

b)

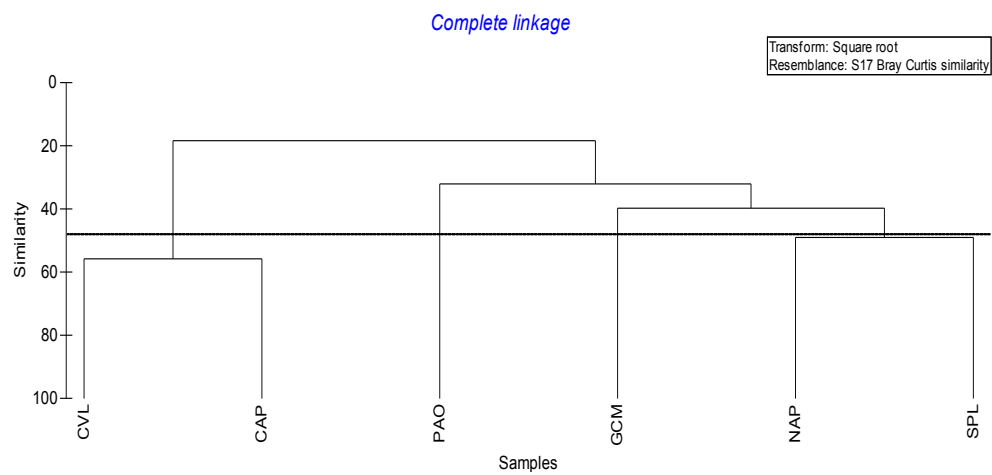

**Figure S7:** Boxplot of  $\delta^{15}\text{N}$  (top panel) and  $\delta^{13}\text{C}$  (bottom panel) values recorded in each considered station.

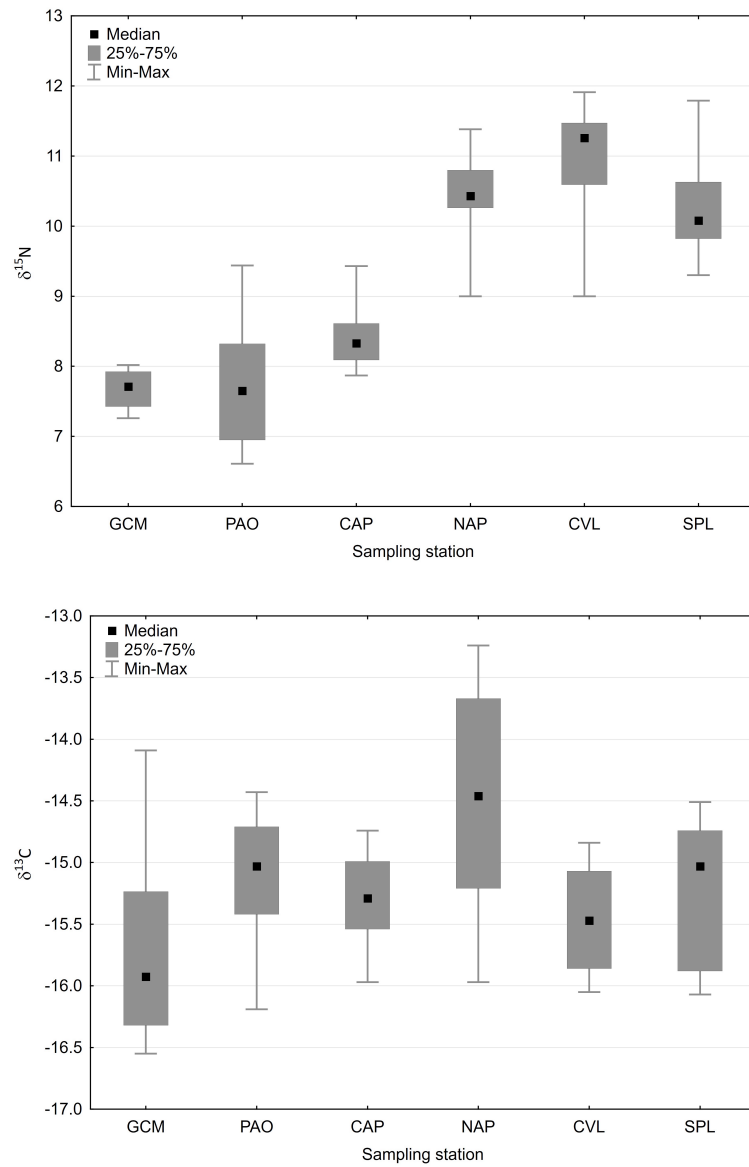

**Table.S1** Anchovy diet composition expressed by percentage.

| Group             | Prey item                           | SPL  | CVL | NAP  | CAP  | PAO | GCM  |
|-------------------|-------------------------------------|------|-----|------|------|-----|------|
| BACILLARIOPHYCEAE | <i>Coscinodiscus</i> spp.           | 0.0  | 0.8 | 0.0  | 0.8  | 0.0 | 0.0  |
| DINOPHYCEAE       | <i>Dinophysis fortii</i>            | 0.0  | 0.0 | 0.6  | 0.0  | 0.0 | 0.0  |
|                   | <i>Phalacroma rotundatum</i>        | 0.0  | 0.0 | 0.0  | 0.0  | 0.4 | 0.0  |
| MOLLUSCA          | Atlantidae indet.                   | 0.0  | 0.4 | 1.8  | 5.5  | 2.8 | 0.0  |
|                   | Bivalvia veliger                    | 0.0  | 3.1 | 0.0  | 1.6  | 0.0 | 0.0  |
| POLYCHAETA        | Polychaeta larvae                   | 0.0  | 0.4 | 0.0  | 0.0  | 0.0 | 2.3  |
| CLADOCERA         | <i>Podon intermedius</i>            | 0.0  | 0.0 | 0.0  | 0.8  | 0.4 | 0.0  |
| OSTRACODA         | Ostracoda indet.                    | 0.0  | 0.0 | 0.0  | 0.0  | 6.8 | 0.0  |
| Calanoida         | <i>Acartia clausi</i>               | 0.0  | 0.4 | 0.0  | 0.0  | 0.0 | 0.0  |
|                   | <i>Acartia</i> spp.                 | 0.0  | 1.5 | 0.0  | 0.8  | 0.0 | 0.0  |
|                   | <i>Calanus helgolandicus</i>        | 0.0  | 0.0 | 0.0  | 0.0  | 0.4 | 0.0  |
|                   | <i>Candacia giesbrechti</i>         | 1.3  | 0.0 | 8.6  | 0.0  | 0.0 | 0.0  |
|                   | <i>Candacia</i> spp.                | 6.7  | 0.8 | 12.3 | 0.0  | 1.1 | 2.3  |
|                   | <i>Centropages typicus</i>          | 13.4 | 3.8 | 16.6 | 0.8  | 1.8 | 2.3  |
|                   | <i>Centropages</i> spp.             | 0.0  | 3.5 | 5.5  | 0.8  | 0.0 | 0.0  |
|                   | <i>Clausocalanus</i> sp.            | 0.0  | 1.5 | 1.8  | 0.0  | 1.1 | 0.0  |
|                   | <i>Euchaeta</i> sp.                 | 0.0  | 0.0 | 0.0  | 0.0  | 0.4 | 0.0  |
|                   | <i>Heterorhabdus</i> spp.           | 0.0  | 0.0 | 0.0  | 0.0  | 0.7 | 0.0  |
|                   | <i>Isias clavipes</i>               | 0.0  | 0.0 | 0.0  | 0.0  | 0.4 | 0.0  |
|                   | <i>Lucicutia</i> spp.               | 0.0  | 0.0 | 1.8  | 0.0  | 0.0 | 0.0  |
|                   | <i>Paracalanus</i> spp.             | 0.0  | 1.5 | 1.2  | 1.6  | 0.0 | 0.0  |
|                   | <i>Pleuromamma abdominalis</i>      | 0.0  | 0.0 | 0.6  | 0.0  | 0.4 | 0.0  |
|                   | <i>Pleuromamma gracilis</i>         | 0.0  | 0.0 | 0.0  | 0.0  | 0.4 | 0.0  |
|                   | <i>Pleuromamma</i> sp.              | 0.0  | 0.4 | 0.6  | 0.0  | 0.4 | 0.0  |
|                   | <i>Temora stylifera</i>             | 5.3  | 0.0 | 2.5  | 0.0  | 0.0 | 0.0  |
|                   | Calanoida prosoma<500               | 0.0  | 1.9 | 0.0  | 0.0  | 0.0 | 0.0  |
|                   | Calanoida 500<prosoma<1000          | 0.0  | 9.6 | 3.1  | 15.6 | 0.4 | 6.9  |
|                   | Calanoida 1000<prosoma<1500         | 2.7  | 6.2 | 6.8  | 0.8  | 2.1 | 18.4 |
|                   | Calanoida 1500<prosoma<2000         | 1.3  | 1.2 | 0.6  | 0.0  | 1.4 | 0.0  |
|                   | Calanoida prosoma>2000              | 0.0  | 0.0 | 3.1  | 0.0  | 0.0 | 0.0  |
| Cyclopoida        | <i>Oithona</i> cf. <i>nana</i>      | 0.0  | 1.5 | 0.0  | 0.0  | 0.0 | 0.0  |
|                   | <i>Oithona</i> cf. <i>plumifera</i> | 1.3  | 1.9 | 0.6  | 0.8  | 0.0 | 0.0  |
|                   | <i>Oithona setigera</i>             | 0.0  | 0.0 | 0.0  | 0.0  | 0.7 | 0.0  |
|                   | <i>Oithona</i> cf. <i>similis</i>   | 0.0  | 0.4 | 0.0  | 0.8  | 0.0 | 0.0  |
|                   | <i>Oithona</i> spp.                 | 0.0  | 0.8 | 0.0  | 0.0  | 0.0 | 0.0  |
| Poecilostomatoida | <i>Corycaeus typicus</i>            | 1.3  | 2.3 | 0.0  | 0.0  | 0.0 | 0.0  |
|                   | <i>Corycaeus</i> spp.               | 5.3  | 0.4 | 0.0  | 0.0  | 0.7 | 0.0  |
|                   | <i>Farranula</i> sp.                | 1.3  | 5.0 | 0.6  | 25.8 | 0.0 | 0.0  |
|                   | <i>Urocorycaeus</i> sp.             | 0.0  | 0.0 | 0.6  | 0.0  | 0.0 | 0.0  |
|                   | <i>Vetтория</i> sp.                 | 0.0  | 0.0 | 0.0  | 0.0  | 0.4 | 2.3  |
|                   | Corycaeidae indet.                  | 2.7  | 0.0 | 1.2  | 0.0  | 0.0 | 0.0  |
|                   | <i>Oncaea venusta</i>               | 0.0  | 0.0 | 0.0  | 0.0  | 0.4 | 0.0  |

|                |                               |      |      |     |      |      |      |
|----------------|-------------------------------|------|------|-----|------|------|------|
|                | <i>Oncaea</i> prosoma<350     | 6.7  | 2.7  | 1.2 | 7.0  | 1.4  | 20.7 |
|                | <i>Oncaea</i> 350<prosoma<600 | 20.0 | 5.8  | 4.9 | 5.5  | 27.7 | 25.3 |
|                | <i>Oncaea</i> prosoma>650     | 1.3  | 0.0  | 0.6 | 0.0  | 3.9  | 2.3  |
|                | <i>Triconia conifera</i>      | 0.0  | 0.0  | 2.5 | 0.0  | 12.4 | 2.3  |
| Harpacticoida  | <i>Euterpina acutifrons</i>   | 4.0  | 31.9 | 0.0 | 25.8 | 0.0  | 0.0  |
|                | <i>Microsetella</i> spp.      | 14.7 | 4.6  | 1.8 | 0.0  | 2.5  | 11.5 |
|                | Harpacticoida indet.          | 0.0  | 0.0  | 0.0 | 0.0  | 0.4  | 0.0  |
|                | Copepoda nauplius             | 0.0  | 0.4  | 0.0 | 1.6  | 0.0  | 0.0  |
|                | Copepoda (not Calanoida)      | 0.0  | 0.4  | 0.0 | 0.0  | 0.0  | 0.0  |
| AMPHIPODA      | Caprellidae indet.            | 0.0  | 0.0  | 0.0 | 0.0  | 0.4  | 0.0  |
| DECAPODA       | Decapoda zoea                 | 1.3  | 0.0  | 1.2 | 0.8  | 0.0  | 0.0  |
|                | Decapoda mysis                | 0.0  | 0.0  | 0.6 | 0.0  | 0.0  | 0.0  |
|                | Decapoda megalopa             | 0.0  | 0.0  | 0.6 | 0.0  | 0.0  | 0.0  |
|                | Decapoda indet.               | 0.0  | 0.0  | 8.3 | 0.0  | 0.2  | 3.4  |
| APPENDICULARIA | <i>Oikopleura</i> spp.        | 0.0  | 0.4  | 2.5 | 0.0  | 26.7 | 0.0  |
|                | Appendicularia indet.         | 0.0  | 0.4  | 0.0 | 2.3  | 0.0  | 0.0  |
| CHAETOGNATHA   | Sagittoidea indet.            | 2.5  | 0.3  | 3.3 | 0.1  | 0.6  | 0.1  |
| TELEOSTEA      | Teleostea larvae indet.       | 0.0  | 0.0  | 0.0 | 0.0  | 0.4  | 0.0  |
| others         | Invertebrata eggs spheric     | 2.7  | 1.5  | 0.0 | 0.8  | 0.0  | 0.0  |
|                | Invertebrata eggs elliptical  | 2.7  | 1.2  | 0.6 | 0.0  | 0.0  | 0.0  |
|                | Invertebrata eggs irregular   | 0.0  | 0.0  | 0.6 | 0.0  | 0.0  | 0.0  |
|                | Pollen grains                 | 0.0  | 0.8  | 0.6 | 0.0  | 0.4  | 0.0  |
|                | Carabidae indet.              | 1.3  | 0.0  | 0.0 | 0.0  | 0.0  | 0.0  |
|                | Insecta indet.                | 0.0  | 0.4  | 0.0 | 0.0  | 0.0  | 0.0  |
